# Supplementary material for: Total synthesis of (±)-swermirin
Source: Royal Society of Chemistry journal article supplement (doi:10.1039/c8qo00655e), 2018-01-01
Supplement: c8qo00655e1.pdf [file c8qo00655e1.pdf]

## General Information

All reactions were carried out under an argon atmosphere using dry solvents under anhydrous conditions, unless otherwise stated. All chemicals were purchased commercially, and used without further purification. Anhydrous toluene, dichloromethane, tetrahydrofuran, *N,N*-dimethylformamide were purchased from Sigma-Aldrich Corporation and used without further purification. Flash chromatography was performed using 230-400 mesh Silica Flash 60® silica gel (Silicycle Inc.). Reactions were monitored by thin-layer chromatography (TLC) carried out on 0.25 mm plates (60F-254) coated with silica gel, using UV light and an aqueous solution of potassium permanganate and sodium carbonate as well as heat as visualizing agents. Organic solutions were concentrated under reduced pressure on a Büchi rotary evaporator. Yields refer to chromatographically purified compounds, unless otherwise stated.

NMR spectra were recorded on either a Bruker Avance 400 ( $^1\text{H}$ : 400 MHz,  $^{13}\text{C}$ : 100 MHz), or a Bruker Avance III HD 600 ( $^{13}\text{C}$ :150 MHz), and were internally referenced based on solvent peaks (for  $\text{CDCl}_3$ , referenced as 7.26 ( $^1\text{H}$ ) and 77.0 ppm ( $^{13}\text{C}$ )). High-resolution mass spectrometric data were obtained using Agilent Technologies 6530 Accurate-Mass Q-TOF LC/MS. Infrared spectra were recorded using a Perkin-Elmer Spectrum Two IR spectrometer.

The following abbreviations were used to explain the multiplicities: s = singlet, d = doublet, t = triplet, q = quartet, m = multiplet, b = broad.

### 5-bromo-6-oxo-3,6-dihydro-2H-pyran-4-yl trifluoromethanesulfonate (**5**)

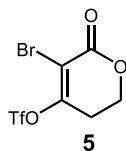

*N*-bromosuccinimide (1.2 g, 6.4 mmol) was added to a solution of dihydro-2H-pyran-2,4(3H)-dione (**4**) (730 mg, 6.40 mmol) in *t*-BuOH (10 mL) under argon. The reaction mixture was concentrated after stirring at room temperature for 2 h. The residue was dissolved in dry DCM (30 mL). Triethylamine (1.3 g, 13 mmol) was added to the mixture under argon. Then trifluoromethanesulfonic anhydride (2.17 g, 7.68 mmol) was added to the mixture dropwise at 0 °C. The mixture was stirred at 0 °C for 20 min. After being concentrated *in vacuo*, the residue

was purified by column chromatography (hexanes: ethyl acetate = 5:1) to give compound **5** (1.3 g, 62%) as a light yellow oil,  $R_f = 0.4$  (hexanes/ethyl acetate = 2:1); **IR**  $\nu_{\max}$  (film)/ $\text{cm}^{-1}$  1744, 1643, 1432, 1222, 1134, 1089;  **$^1\text{H}$  NMR** (400 MHz,  $\text{CDCl}_3$ )  $\delta$  4.51 (t,  $J = 6.4$  Hz, 2H), 2.99 (t,  $J = 6.4$  Hz, 2H);  **$^{13}\text{C}$  NMR** (100 MHz,  $\text{CDCl}_3$ )  $\delta$  159.1, 158.2, 119.7 (q,  $J = 319$  Hz), 107.1, 64.2, 29.1; **HR-MS**  $m/z$  calcd for  $\text{C}_6\text{H}_5\text{BrF}_3\text{O}_5\text{S}$   $[\text{M} + \text{H}]^+$  324.8988 and 326.8967, found 324.8975 and 326.8964.

**(E)-3-bromo-4-(1-hydroxybut-2-en-2-yl)-5,6-dihydro-2H-pyran-2-one (7)**

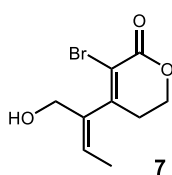

A Schlenk tube (250 mL) was charged with lithium chloride (712 mg; 16.9 mmol) and flame-dried under high vacuum. Upon cooling,  $\text{CuCl}$  (2.5 g; 25 mmol) was added and then degassed with Argon (four times). A solution of compound **5** (914 mg, 2.81 mmol) and (Z)-2-(tributylstannyl)but-2-en-1-ol (**6**) (1.53 g, 4.22 mmol) in THF/toluene (1:1, 50 mL) was added to the Schlenk tube under argon, followed by tetrakis(triphenylphosphine)palladium(0) (162 mg, 0.14 mmol). After the reaction mixture was heated at 60 °C for 30 min, the mixture was poured into water, and extracted with ethyl acetate (three times). The combined organic layer was dried and evaporated *in vacuo*, and the residue was purified by column chromatography (hexanes: ethyl acetate = 5:1 to dichloromethane: ethyl acetate = 7:1) to give (E)-3-bromo-4-(1-hydroxybut-2-en-2-yl)-5,6-dihydro-2H-pyran-2-one (**7**) (558 mg, 80%) as a light yellow oil;  $R_f = 0.5$  (dichloromethane/ethyl acetate = 2:1); **IR**  $\nu_{\max}$  (film)/ $\text{cm}^{-1}$  3442, 2954, 2923, 2852, 1725, 1397, 1276, 1112, 1073;  **$^1\text{H}$  NMR** (400 MHz,  $\text{CDCl}_3$ )  $\delta$  5.71 (q,  $J = 6.8$  Hz, 1H), 4.47 (t,  $J = 6.0$  Hz, 2H), 4.24 (s, 2H), 2.67 (br.s, 2H), 2.18 (br.s, 1H), 1.62 (d,  $J = 6.8$  Hz, 3H);  **$^{13}\text{C}$  NMR** (100 MHz,  $\text{CDCl}_3$ )  $\delta$  160.2, 155.9, 138.6, 125.3, 112.3, 66.0, 65.0, 31.2, 14.6; **HRMS**  $m/z$  calcd for  $\text{C}_9\text{H}_{12}\text{BrO}_3$   $[\text{M} + \text{H}]^+$  246.9964 and 248.9944, found 246.9964 and 248.9943.

**(E)-4-(1-hydroxybut-2-en-2-yl)-3-vinyl-5,6-dihydro-2H-pyran-2-one (8)**

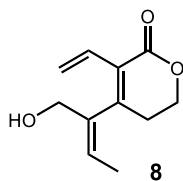

A Schlenk tube (25 mL) was charged with LiCl (172 mg, 4.05 mmol) and flame-dried under high vacuum. Upon cooling, (*t*-Bu<sub>3</sub>P)<sub>2</sub>Pd (21 mg, 0.04 mmol) was added, and the mixture was degassed four times under high vacuum with an argon purge. DMF (3 mL) was introduced while stirring, followed by tributylvinylstannane (257 mg, 0.81 mmol) and a solution of **5** (100 mg, 0.41 mmol) in DMF (2 mL). The resulting mixture was rigorously degassed four times by the freeze-pump-thaw process (−78 °C to 25 °C, Ar). The reaction mixture was then stirred at 60 °C for 3 h. After completion of the reaction, as indicated by MS, the reaction mixture was cooled, diluted with EtOAc (20 mL), and washed with water (20 mL). The aqueous layer was extracted with EtOAc (3 × 10 mL), and the combined organic layer was washed with brine (2 × 10 mL) and dried over Na<sub>2</sub>SO<sub>4</sub>. The solvent was removed *in vacuo*, and the residue was purified by flash column chromatography on silica gel (hexanes: ethyl acetate = 3:1, then dichloromethane: ethyl acetate = 7:1) to give the desired product **8** (63 mg, 80%) as a light yellow oil, *R*<sub>f</sub> = 0.5 (dichloromethane/ethyl acetate = 2:1); **IR** *v*<sub>max</sub>(film)/cm<sup>−1</sup> 3418, 3020, 2981, 2938, 2856, 1700, 1396, 1301, 1143, 1052; **<sup>1</sup>H NMR** (400 MHz, CDCl<sub>3</sub>) δ 6.31 (dd, *J* = 17.6, 11.6 Hz, 1H), 6.07 (d, *J* = 17.6 Hz, 1H), 5.75 (q, *J* = 6.8 Hz, 1H), 5.34 (d, *J* = 11.6 Hz, 1H), 4.36 (t, *J* = 6.0 Hz, 2H), 4.20 (s, 1H), 2.56 (t, *J* = 6.0 Hz, 2H), 1.73 (br.s, 1H), 1.58 (d, *J* = 7.2 Hz, 3H); **<sup>13</sup>C NMR** (100 MHz, CDCl<sub>3</sub>) δ 163.5, 151.5, 138.1, 128.9, 125.5, 124.9, 120.0, 65.4, 65.1, 29.3, 14.5; HRMS *m/z* calcd for C<sub>11</sub>H<sub>15</sub>O<sub>3</sub> [*M* + *H*]<sup>+</sup> 195.1016, found 195.1011.

**(*E*)-2-(6-oxo-5-vinyl-3,6-dihydro-2H-pyran-4-yl)but-2-enal (**9**)**

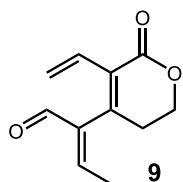

To a solution of compound **8** (63 mg, 0.21 mmol) in DCM (5 mL) was added Dess-Martin periodinane (182 mg, 0.43 mmol) at room temperature. The reaction mixture was stirred for 30 min under argon atmosphere. The reaction was quenched with saturated Na<sub>2</sub>S<sub>2</sub>O<sub>3</sub> and stirred for 20 min. The organic layer was washed by brine, dried with Na<sub>2</sub>SO<sub>4</sub> and concentrated. The

residue was purified by flash column chromatography on silica gel (hexane/ethyl acetate = 3/1) to give **7** (60 mg) in 95% yield as a colorless oil,  $R_f = 0.5$  (hexane/ethyl acetate = 1:1); **IR**  $\nu_{\max}$  (film)/ $\text{cm}^{-1}$  2833, 2712, 1717, 1682, 1627, 1299, 1143;  **$^1\text{H}$  NMR** (400 MHz,  $\text{CDCl}_3$ )  $\delta$  9.47 (s, 1H), 6.83 (q,  $J = 7.2$  Hz, 1H), 6.11 (dd,  $J = 17.6, 11.2$  Hz, 1H), 6.01 (d,  $J = 17.6$  Hz, 1H), 5.34 (d,  $J = 11.2$  Hz, 1H), 4.41-4.03 (m, 2H), 2.49 (br.s, 2H), 1.92 (d,  $J = 6.8$  Hz, 3H);  **$^{13}\text{C}$  NMR** (100 MHz,  $\text{CDCl}_3$ )  $\delta$  191.8, 162.8, 151.5, 145.6, 142.4, 128.2, 127.4, 121.0, 65.3, 28.9, 16.1; HRMS  $m/z$  calcd for  $\text{C}_{11}\text{H}_{13}\text{O}_3$   $[\text{M} + \text{H}]^+$  193.0859, found 193.0854.

**(E)-4-(1-(1,3-dioxolan-2-yl)prop-1-en-1-yl)-3-vinyl-5,6-dihydro-2H-pyran-2-one (10)**

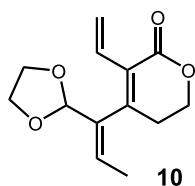

To a solution of compound **9** (138 mg, 0.72 mmol), ethylene glycol (444 mg, 7.2 mmol) and trimethyl orthoformate (381 mg, 3.6 mmol) in DCM (10 mL) was added *p*-toluenesulfonic acid monohydrate (12 mg, 0.07 mmol). The reaction mixture was stirred at room temperature for 2 h under argon atmosphere. The reaction mixture was quenched by triethylamine (0.2 mL), and washed with brine and dried over  $\text{Na}_2\text{SO}_4$ . The solvent was removed *in vacuo*, and the residue was purified by flash column chromatography on silica gel (hexanes/ethyl acetate = 7:1) to give the desired product **10** (146 mg, 84%) as a colorless oil.  $R_f = 0.6$  (hexane/ethyl acetate = 1:1); **IR**  $\nu_{\max}$  (film)/ $\text{cm}^{-1}$  3024, 2981, 2950, 2891, 1717, 1299, 1143, 1124, 1077, 1038, 940;  **$^1\text{H}$  NMR** (400 MHz,  $\text{CDCl}_3$ )  $\delta$  6.36 (dd,  $J = 17.6, 12.0$  Hz, 1H), 6.10 (dd,  $J = 17.6, 2.0$  Hz, 1H), 5.95 (q,  $J = 6.8$  Hz, 1H), 5.33-5.30 (m, 2H), 4.32 (t,  $J = 6.0$  Hz, 2H), 3.93-3.87 (m, 4H), 2.59-2.56 (m, 2H), 1.60 (d,  $J = 6.8$  Hz, 3H);  **$^{13}\text{C}$  NMR** (100 MHz,  $\text{CDCl}_3$ )  $\delta$  163.0, 149.4, 135.4, 129.3, 128.9, 126.6, 119.7, 105.6, 65.1, 64.9 (2C), 30.1, 14.2; HRMS  $m/z$  calcd for  $\text{C}_{13}\text{H}_{17}\text{O}_4$   $[\text{M} + \text{H}]^+$  237.1121, found 237.1118.

**Swermirin (1)**

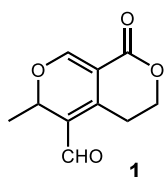

To a stirred solution of compound **10** (16 mg, 0.068 mmol) in acetone/water (1:1, 5 mL) was

added osmium tetroxide as a 2.5% weight solution in *t*-BuOH (50  $\mu$ L, 0.004 mmol) and 4-methylmorpholine *N*-oxide (16 mg, 0.136 mmol) at 0 °C. The mixture was stirred at room temperature for 2 h. After completion of the reaction, as indicated by TLC, sodium periodate (44 mg, 0.204 mmol) was added and the reaction mixture was stirred for another 20 min. The reaction mixture was diluted with water (10 mL), and extracted with EtOAc (3 $\times$ 10 mL), and the combined organic layer was washed with brine (2  $\times$  10 mL) and dried over Na<sub>2</sub>SO<sub>4</sub>. After the drying agent was filtered off, *p*-toluenesulfonic acid monohydrate (1.3 mg, 0.007 mmol) was added to the organic solution. The mixture was stirred at room temperature for 10 min, quenched by triethylamine (0.1 mL), and concentrated. The residue was purified by flash column chromatography on silica gel (dichloromethane/ethyl acetate = 9:1) to give the desired product **1** (7 mg, 54%) as a light yellow solid.  $R_f$  = 0.6 (DCM/ethyl acetate = 2:1); **IR**  $\nu_{\max}$  (film)/cm<sup>-1</sup> 1721, 1651, 1636, 1557, 1472, 1448, 1399, 1370, 1360, 1336, 1301, 1279, 1166, 1109, 1033, 976, 949; **<sup>1</sup>H NMR** (400 MHz, CDCl<sub>3</sub>)  $\delta$  9.88 (s, 1H), 7.93 (s, 1H), 5.64 (q, *J* = 6.4 Hz, 1H), 4.46-4.34 (m, 2H), 3.14-3.03 (m, 2H), 1.40 (d, 6.4 Hz, 3H); **<sup>13</sup>C NMR** (150 MHz, CDCl<sub>3</sub>)  $\delta$  185.4, 163.6, 163.1, 142.4, 120.4, 104.0, 73.2, 65.0, 22.8, 19.8; HRMS *m/z* calcd for C<sub>10</sub>H<sub>11</sub>O<sub>4</sub> [M + H]<sup>+</sup> 195.0652, found 195.0668.

Current Data Parameters  
 NAME PH-IV-48-1-1  
 EXPNO 1  
 PROCNO 1

F2 - Acquisition Parameters  
 Date\_ 20180424  
 Time 9.26

INSTRUM spect  
 PROBHD 5 mm PABBI 1H/  
 PULPROG zg

TD 32768  
 SOLVENT CDCl3

DS 13  
 SMH 5592.841 Hz  
 FIDRES 0.170680 Hz  
 AQ 2.9295092 sec

RG 203.2  
 DM 89.400 usec  
 DE 6.00 usec  
 TE 299.4 K

D1 6.00000000 sec  
 TD0 1

===== CHANNEL f1 =====

NUC1 1H  
 P1 8.25 usec  
 PL1 -1.00 dB  
 SF01 400.1316000 MHz

F2 - Processing Parameters  
 SI 32768  
 SF 400.1300112 MHz

WDW no  
 SSB 0  
 LB 0.00 Hz  
 GB 0  
 PC 1.00

7.259

4.532  
 4.516  
 4.500

3.014  
 2.998  
 2.982

1.545  
 1.538

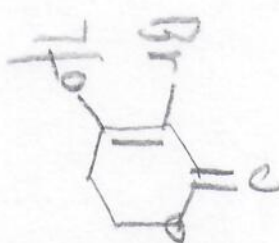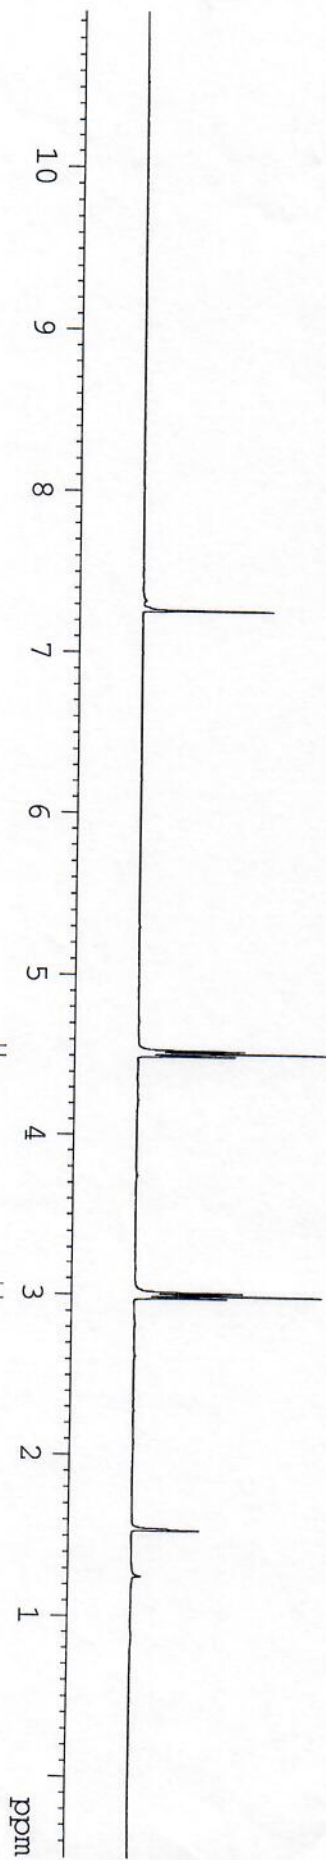



Current Data Parameters  
NAME PH-I-10-1  
EXPNO 2  
PROCNO 1

F2 - Acquisition Parameters

Date\_ 20170701  
Time 17.50  
INSTRUM 5 mm PABBI 1H/  
PROBHD spect  
PULPROG zgpg30  
TD 81920  
SOLVENT CDCl3  
NS 12319  
DS 2  
SWH 29239.766 Hz  
FIDRES 0.356931 Hz  
AQ 1.4008820 sec  
RG 29193  
DM 17.100 usec  
DE 20.00 usec  
TE 296.9 K  
D1 3.00000000 sec  
d11 0.03000000 sec  
DELTA 2.90000010 sec  
TD0 1

===== CHANNEL f1 =====

NUC1 13C  
P1 14.50 usec  
PL1 -5.00 dB  
SFO1 100.6208547 MHz

===== CHANNEL f2 =====

CPDPRG2 waltz16  
NUC2 1H  
PCPD2 70.00 usec  
PL2 -1.00 dB  
PL12 17.57 dB  
PL13 18.00 dB  
SFO2 400.1316005 MHz

F2 - Processing parameters

SI 65536  
SF 100.6127765 MHz  
WDW EM  
SSB 0  
LB 2.00 Hz  
GB 0  
PC 1.00

159.177  
158.286

122.919  
119.731  
116.541  
113.353  
107.180

77.270  
76.952  
76.633

64.277

29.188

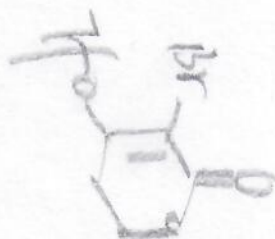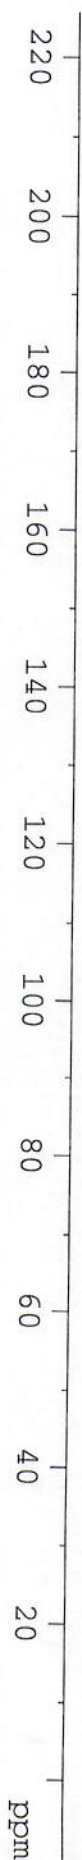

Current Data Parameters  
 NAME PH-II-33-1-b  
 EXPNO 1  
 PROCNO 1

F2 - Acquisition Parameters  
 Date\_ 20170921  
 Time 16.26

INSTRUM spect  
 PROBHD 5 mm PABBO BB-  
 PULPROG zg  
 TD 32768  
 SOLVENT CDCl3  
 NS 11  
 DS 2  
 SWH 5592.841 Hz  
 FIDRES 0.170680 Hz  
 AQ 2.9295092 sec  
 RG 57  
 DW 89.400 usec  
 DE 6.00 usec  
 TE 296.3 K  
 D1 6.00000000 sec  
 TD0 1

===== CHANNEL f1 =====  
 NUC1 1H  
 P1 11.00 usec  
 PL1 -2.00 dB  
 SFO1 400.1316000 MHz

F2 - Processing parameters  
 SI 32768  
 SF 400.130093 MHz  
 WDW no  
 SSB 0  
 LB 0.00 Hz  
 GB 0  
 PC 1.00

7.259

5.735  
 5.718  
 5.701  
 5.685

4.462  
 4.447  
 4.432  
 4.240

2.671

1.622  
 1.605

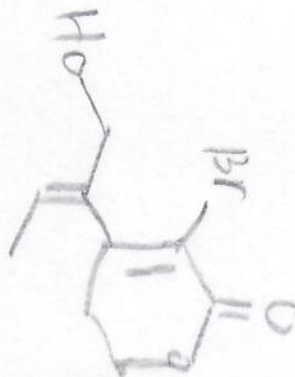

1.000

2.092  
 2.072

2.020

0.952

3.142

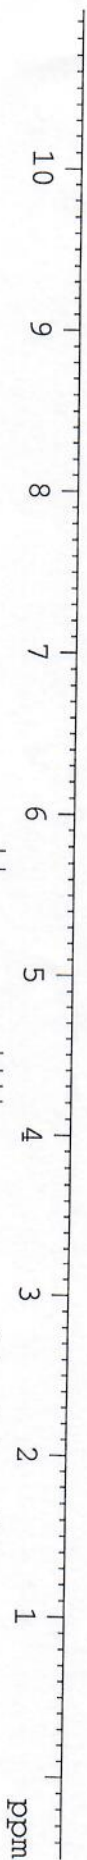



Current Data Parameters  
 NAME PH-II-33-1-b-carbon  
 EXPNO 2  
 PROCNO 1

F2 - Acquisition Parameters  
 Date\_ 20170921  
 Time 16.42

INSTRUM spect  
 PROBHD 5 mm PABBO BB-  
 PULPROG zgpg30  
 TD 81920  
 SOLVENT CDCl3  
 NS 128  
 DS 0

SWH 29239.766 Hz  
 FIDRES 0.356931 Hz  
 AQ 1.4008820 sec  
 RG 20642.5

DM 17.100 usec  
 DE 20.00 usec  
 TE 297.4 K

D1 3.00000000 sec  
 d11 0.03000000 sec  
 DELTA 2.90000010 sec  
 TD0 1

===== CHANNEL f1 =====  
 NUC1 13C  
 P1 8.00 usec  
 PL1 -3.00 dB  
 SFO1 100.6208547 MHz

===== CHANNEL f2 =====  
 CPDPRG2 waltz16  
 NUC2 1H  
 PCPD2 70.00 usec  
 PL2 -4.00 dB  
 PL12 9.98 dB  
 PL13 13.00 dB  
 SFO2 400.1316005 MHz

F2 - Processing parameters  
 SI 65536  
 SF 100.6127765 MHz  
 WDW EM  
 SSB 0  
 LB 2.00 Hz  
 GB 0  
 PC 1.00

160.262  
 155.942

138.640

125.388

112.304

77.336  
 77.018  
 76.700  
 66.011  
 65.076

31.208

14.640

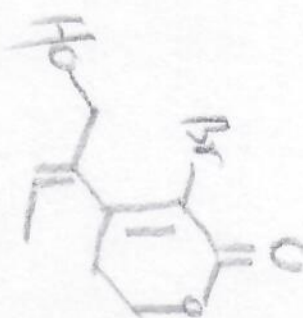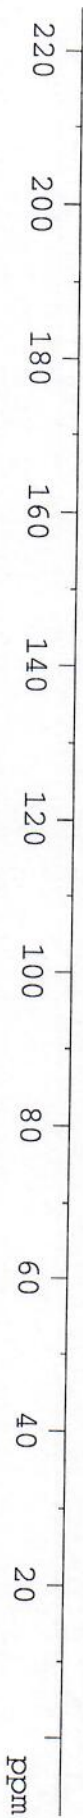

Current Data Parameters  
NAME PH-IV-49-0-1  
EXPNO 1  
PROCNO 1

F2 - Acquisition Parameters  
Date\_ 20180424  
Time 21.20

INSTRUM 5 mm PABBI 1H/  
PROBHD zg  
PULPROG 32768  
TD 15  
SOLVENT CDC13

DS 2  
SWH 5592.841 Hz  
FIDRES 0.170680 Hz  
AQ 2.9295092 sec

RG 50.8  
DW 89.400 usec  
DE 6.00 usec  
TE 300.1 K  
D1 6.00000000 sec  
TD0 1

===== CHANNEL f1 =====  
NUC1 1H

P1 8.25 usec  
PL1 -1.00 dB  
SFO1 400.1316000 MHz

F2 - Processing parameters  
SI 32768  
SF 400.1300117 MHz  
WDW no  
SSB 0  
LB 0.00 Hz  
GB 0  
PC 1.00

7.261  
6.347  
6.318  
6.303  
6.274  
6.075  
6.031  
5.757  
5.740  
5.345  
5.316  
4.377  
4.362  
4.346  
4.206  
2.584  
2.569  
2.554  
1.733  
1.587  
1.569

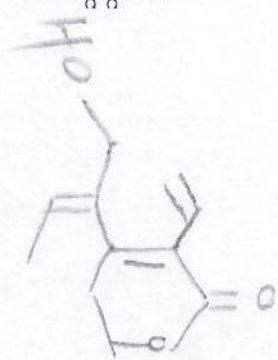

1.000  
1.053  
1.035  
1.128  
2.207  
2.182  
2.142  
1.029  
3.270

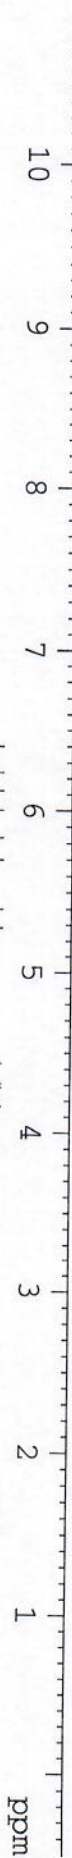

Current Data Parameters  
 NAME PH-II-25-1-C  
 EXPNO 2  
 PROCNO 1

F2 - Acquisition Parameters

Date\_ 20170916  
 Time 9.18  
 INSTRUM spect  
 PROBD 5 mm PABO BB-  
 PULPROG zgpg30  
 TD 81920  
 SOLVENT CDCl3  
 NS 57  
 DS 0  
 SWH 29239.766 Hz  
 FIDRES 0.356931 Hz  
 AQ 1.4008820 sec  
 RG 20642.5  
 DW 17.100 usec  
 DE 20.00 usec  
 TE 297.7 K  
 D1 3.00000000 sec  
 d11 0.03000000 sec  
 DELTA 2.90000010 sec  
 TD0 1

===== CHANNEL f1 =====

NUC1 13C  
 P1 8.00 usec  
 PL1 -3.00 dB  
 SFO1 100.6208547 MHz

===== CHANNEL f2 =====

CPDPRG2 waltz16  
 NUC2 1H  
 PCPD2 70.00 usec  
 PL2 -4.00 dB  
 PL12 9.98 dB  
 PL13 13.00 dB  
 SFO2 400.1316005 MHz

F2 - Processing Parameters

SI 65536  
 SF 100.6127765 MHz  
 WDW EM  
 SSB 0  
 LB 0  
 GB 2.00 Hz  
 PC 1.00

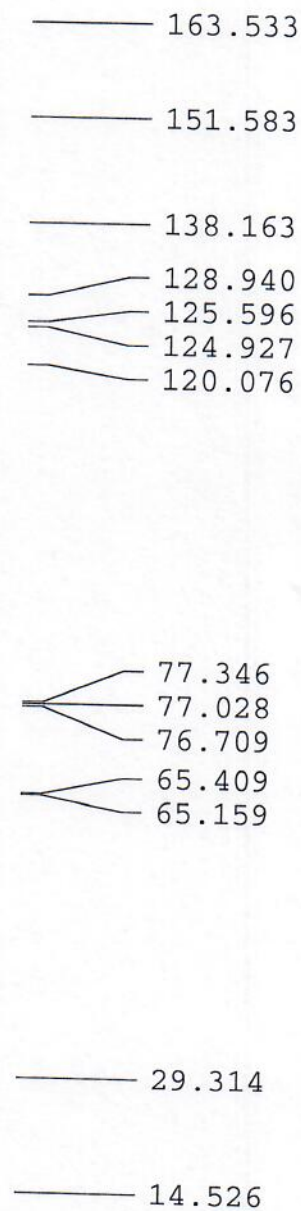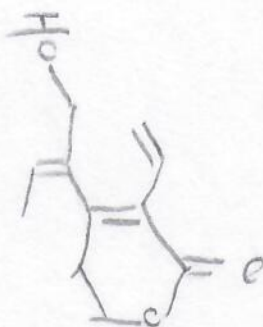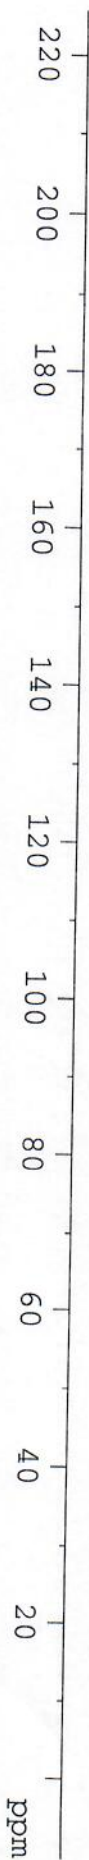



Current Data Parameters  
 NAME PH-IV-53-1  
 EXPNO 1  
 PROCNO 1

F2 - Acquisition Parameters

Date\_ 20180426  
 Time 17.42  
 INSTRUM 5 mm PABBI 1H/  
 PROBD 1H/  
 PULPROG zg  
 TD 32768  
 SOLVENT CDCl3  
 NS 11  
 DS 2  
 SWH 5592.841 Hz  
 FIDRES 0.170680 Hz  
 AQ 2.9295092 sec  
 RG 101.6  
 DW 89.400 usec  
 DE 6.00 usec  
 TE 299.7 K  
 D1 6.00000000 sec  
 TD0 1

===== CHANNEL f1 =====  
 NUC1 1H  
 P1 8.25 usec  
 PL1 -1.00 dB  
 SFO1 400.1316000 MHz

F2 - Processing Parameters  
 SI 32768  
 SF 400.1300115 MHz  
 WDW no  
 SSB 0  
 LB 0  
 GB 0  
 PC 1.00

7.262  
 7.259  
 6.852  
 6.835  
 6.817  
 6.799  
 6.147  
 6.119  
 6.104  
 6.075  
 6.012  
 5.968  
 5.341  
 5.313  
 4.415  
 4.403

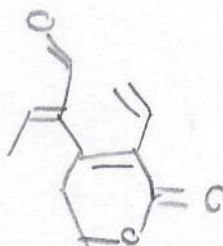

2.497  
 1.926  
 1.909

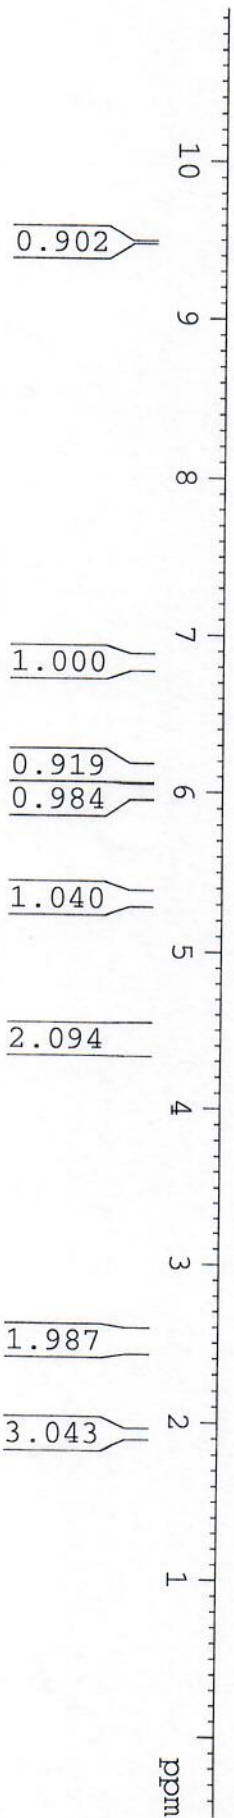

191.835

162.812

151.506

145.610

142.493

128.267

127.471

121.094

77.449

77.129

76.811

65.302

28.900

16.168

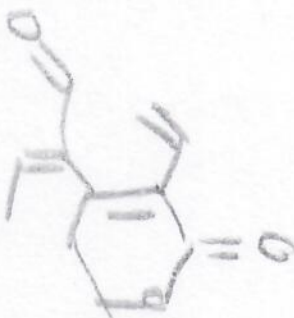

Current Data Parameters  
NAME PH-II-60-1-Carbon  
EXPNO 2  
PROCNO 1

F2 - Acquisition Parameters  
Date\_ 20171012  
Time 17.19

INSTRUM 5 mm PABBO BB-  
PROBHD spect  
PULPROG zgpg30

TD 81920  
SOLVENT CDCl3

NS 46  
DS 0

SWH 29239.766 Hz  
FIDRES 0.356931 Hz

AQ 1.4008820 sec  
RG 20642.5

DW 17.100 usec  
DE 20.00 usec

TE 296.7 K  
D1 3.00000000 sec

d11 0.03000000 sec  
DELTA 2.90000010 sec

TD0 1

===== CHANNEL f1 =====

NUC1 13C

P1 8.00 usec  
PL1 -3.00 dB

SFO1 100.6208547 MHz

===== CHANNEL f2 =====

CPDPRG2 waltz16

NUC2 1H

PCPD2 70.00 usec  
PL2 -4.00 dB

PL12 9.98 dB  
PL13 13.00 dB

SFO2 400.1316005 MHz

F2 - Processing parameters

SI 65536

SF 100.6127765 MHz

WDW EM

SSB 0

LB 2.00 Hz

GB 0

PC 1.00

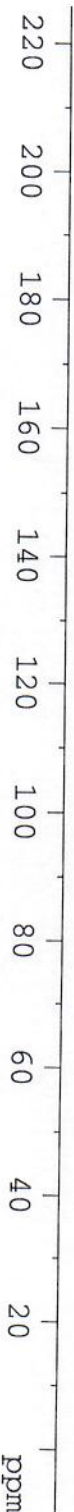

Current Data Parameters  
NAME PH-IV-50-1-1  
EXPNO 1  
PROCNO 1

F2 - Acquisition Parameters  
Date\_ 20180425  
Time 21.05

INSTRUM spect  
PROBHD 5 mm PABBI 1H/  
PULPROG zg  
TD 32768  
SOLVENT CDCl3  
NS 12  
DS 2  
SWH 5592.841 Hz  
FIDRES 0.170680 Hz  
AQ 2.9295092 sec  
RG 128  
DW 89.400 usec  
DE 6.00 usec  
TE 301.1 K  
D1 6.00000000 sec  
TD0 1

===== CHANNEL f1 =====  
NUC1 1H  
P1 8.25 usec  
PL1 -1.00 dB  
SFO1 400.1316000 MHz  
F2 - Processing parameters  
SI 32768  
SF 400.1300112 MHz  
WDW no  
SSB 0  
LB 0.00 Hz  
GB 0  
PC 1.00

- 7.260
- 6.397
- 6.367
- 6.353
- 6.323
- 6.106
- 6.101
- 6.062
- 6.057
- 5.968
- 5.951
- 5.934
- 5.916
- 5.336
- 5.331
- 5.316
- 5.307
- 5.302
- 4.340
- 4.325
- 4.309
- 3.932
- 3.927
- 3.923
- 3.918
- 3.914
- 3.910
- 3.897
- 3.893
- 3.888
- 3.884
- 3.879
- 3.875
- 2.596
- 2.581
- 2.566
- 1.607
- 1.590

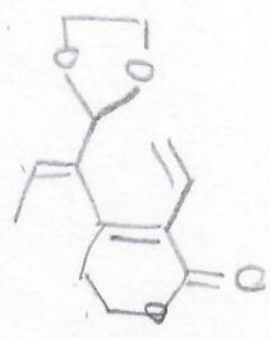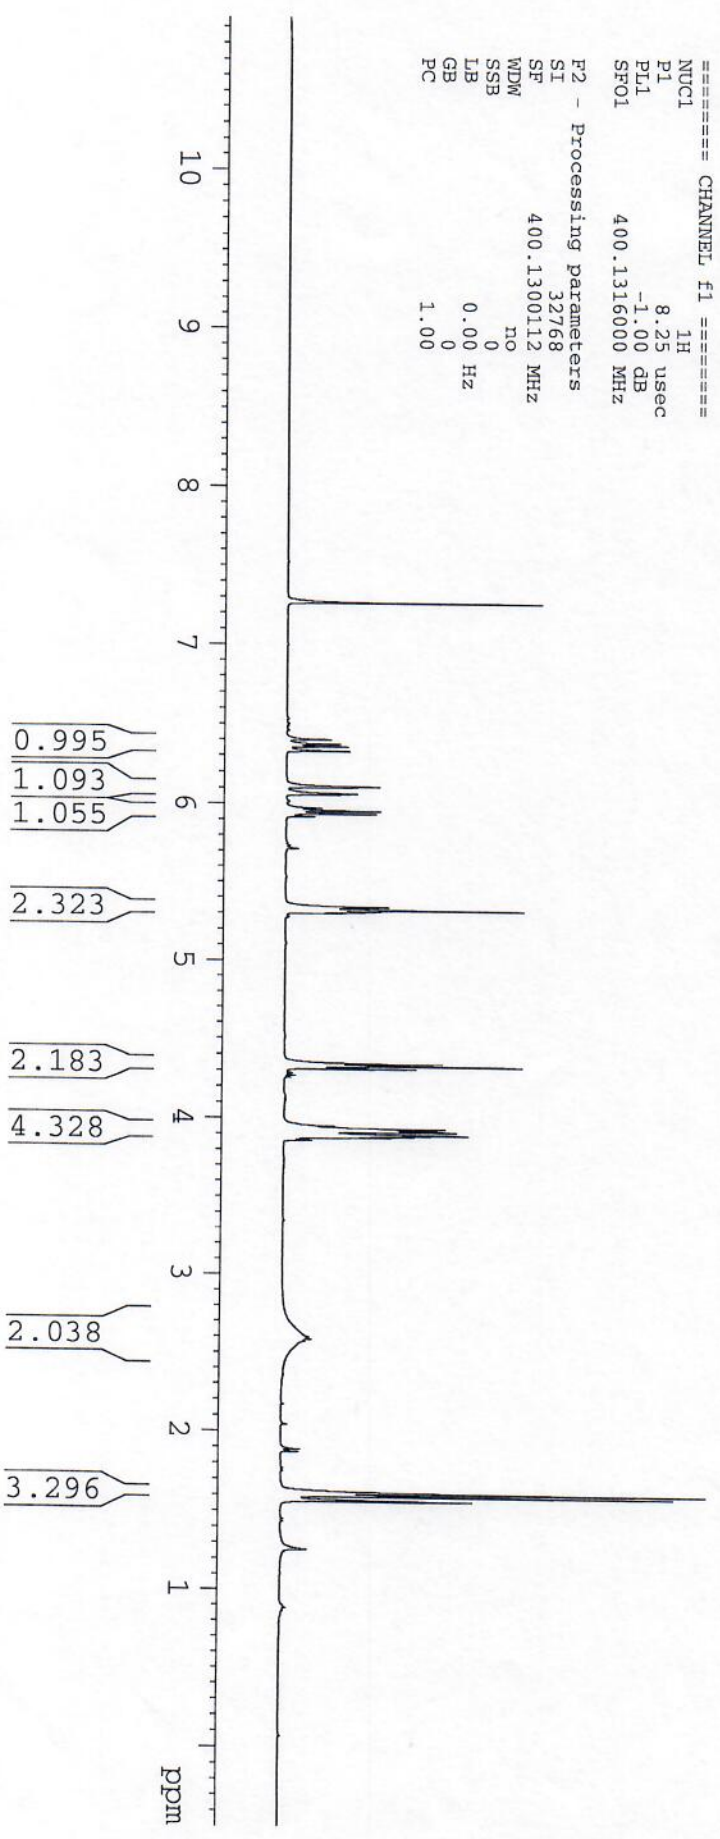



Current Data Parameters  
 NAME PH-II-61-1-Carbon  
 EXPNO 2  
 PROCNO 1

F2 - Acquisition Parameters  
 Date\_ 20171013  
 Time 13.18

INSTRUM spect  
 PROBD 5 mm PABBO BB-  
 PULPROG zgpg30

TD 81920  
 SOLVENT CDCl3  
 NS 49

DS 0  
 SWH 29239.766 Hz  
 FIDRES 0.356931 Hz  
 AQ 1.4008820 sec

RG 20642.5  
 DM 17.100 usec  
 DE 20.00 usec

TE 297.0 K  
 D1 3.00000000 sec  
 d11 0.03000000 sec  
 DELTA 2.90000010 sec

TD0 1

===== CHANNEL f1 =====  
 NUC1 13C  
 P1 8.00 usec  
 PL1 -3.00 dB  
 SF01 100.6208547 MHz

===== CHANNEL f2 =====  
 CPDPRG2 waltz16  
 NUC2 1H  
 PCPD2 70.00 usec  
 PL2 -4.00 dB  
 PL12 9.98 dB  
 PL13 13.00 dB  
 SF02 400.1316005 MHz

F2 - Processing parameters  
 SI 65536  
 SF 100.6127765 MHz  
 WDW EM  
 SSB 0  
 LB 2.00 Hz  
 GB 0  
 PC 1.00

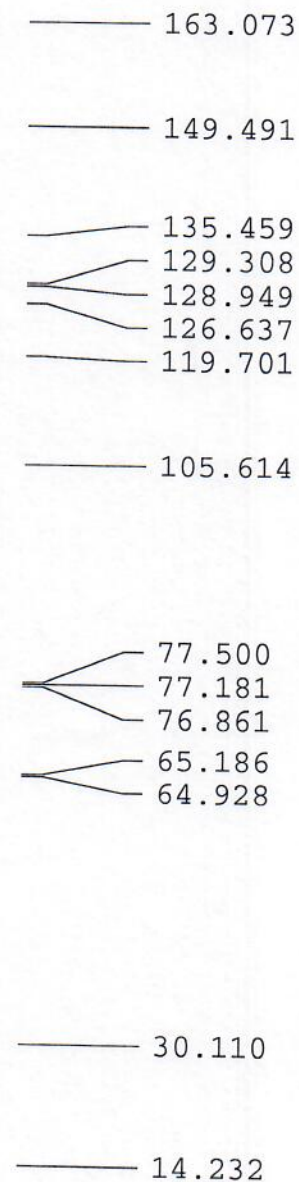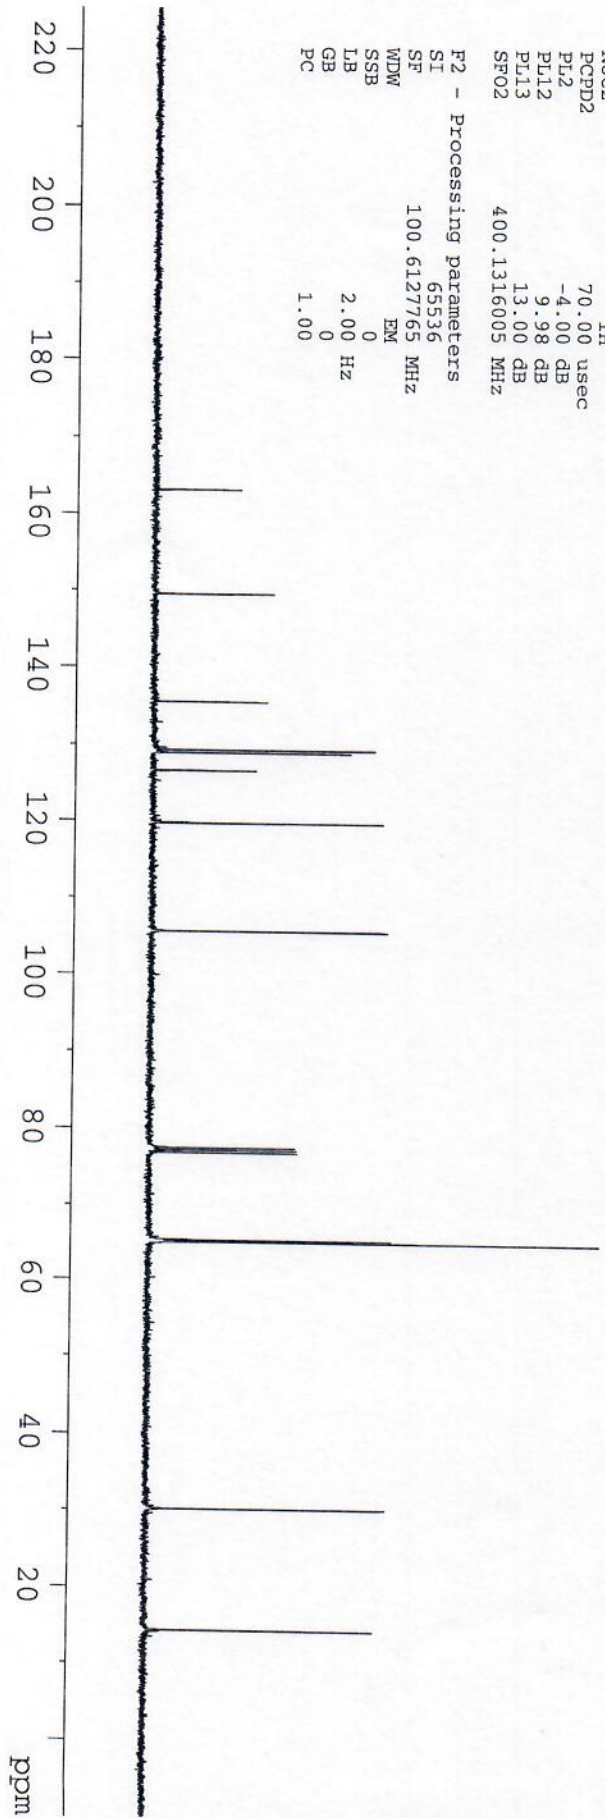

Current Data Parameters  
NAME PH-IV-52-NP-3  
EXPNO 1  
PROCNO 1

# F2 - Acquisition Parameters

Date\_ 20180426  
Time 10.58  
INSTRUM 5 mm PABBI 1H/  
PROBHD spect  
PULPROG zg  
TD 32768  
SOLVENT CDCl3  
NS 15  
DS 2  
SWH 5592.841 Hz  
FIDRES 0.170680 Hz  
AQ 2.9295092 sec  
RG 256  
DM 89.400 usec  
DE 6.00 usec  
TE 300.5 K  
D1 6.00000000 sec  
TD0 1

===== CHANNEL f1 =====  
NUC1 1H  
P1 8.25 usec  
PL1 -1.00 dB  
SFO1 400.1316000 MHz

F2 - Processing Parameters  
SI 32768  
SF 400.1300112 MHz  
WDW no  
SSB 0  
LB 0.00 Hz  
GB 0  
PC 1.00

- 9.880
- 7.939
- 7.261
- 5.659
- 5.643
- 5.627
- 5.611
- 4.462
- 4.450
- 4.434
- 4.419
- 4.407
- 4.396
- 4.388
- 4.377
- 4.368
- 4.359
- 4.348
- 3.142
- 3.131
- 3.116
- 3.100
- 3.085
- 3.074
- 3.063
- 3.051
- 3.041
- 3.021
- 3.010
- 1.403
- 1.387

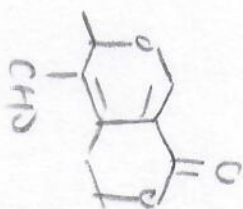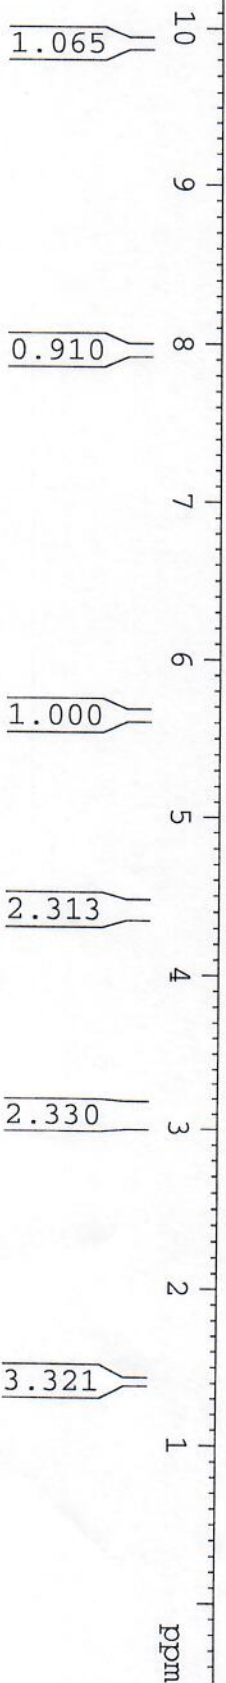

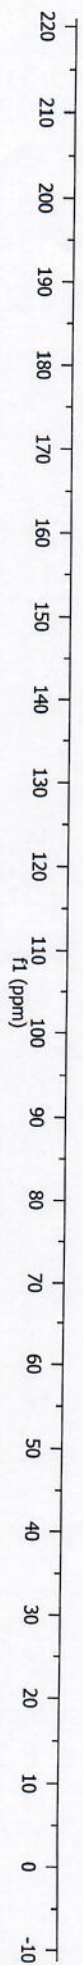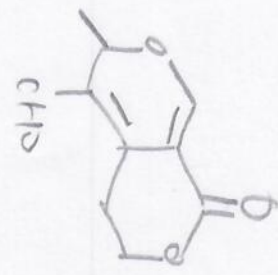

—185.42

163.62  
163.15

—142.49

—120.43

—104.09

77.21  
77.00  
76.79  
—73.29

—65.03

—22.81  
—19.83

**Table 1.** The comparison of  $^1\text{H}$  NMR data of natural swermirin, gentiogenal and synthetic swermirin

| Natural swermirin<br>( $\text{CDCl}_3$ )* | Gentiogenal<br>(90 MHz, $\text{CDCl}_3$ )* | Synthetic swerimirin<br>(400 MHz, $\text{CDCl}_3$ ) |
|-------------------------------------------|--------------------------------------------|-----------------------------------------------------|
| 9.88 (s, 1H)                              | 9.88 (s, 1H)                               | 9.88 (s, 1H)                                        |
| 7.93 (s, 1H)                              | 7.95 (s, 1H)                               | 7.93 (s, 1H)                                        |
| 5.63 (q, $J = 7.0$ , 1H)                  | 5.64 (q, $J = 6.5$ , 1H)                   | 5.64 (q, $J = 6.4$ Hz, 1H)                          |
| 4.41 (t, $J = 5.9$ Hz, 2 H)               | 4.43-4.44 (t, $J = 4.9$ Hz, 2 H)           | 4.46-4.34 (m, 2H)                                   |
| 3.08 (t, $J = 5.9$ Hz, 2H)                | 3.09-3.11 (t, $J = 4.9$ Hz, 2H)            | 3.14-3.03 (m, 2H)                                   |
| 1.4 (d, $J = 7.0$ Hz, 3H)                 | 1.39 (d, $J = 6.5$ Hz, 3H)                 | 1.40 (d, $J = 6.4$ Hz, 3H)                          |

\*TMS as internal standard;

**Table 2.** The comparison of  $^{13}\text{C}$  NMR data of natural swerimirin, gentiogenal and synthetic swerimirin.

| Natural swerimirin<br>( $\text{CDCl}_3$ )* | Gentiogenal<br>(75.5 MHz, $\text{CDCl}_3$ )* | Synthetic swerimirin<br>(150 MHz, $\text{CDCl}_3$ ) |
|--------------------------------------------|----------------------------------------------|-----------------------------------------------------|
| 19.81                                      | 19.8                                         | 19.8                                                |
| 22.82                                      | 22.6                                         | 22.8                                                |
| 65.15                                      | 65.1                                         | 65.0                                                |
| 73.29                                      | 73.1                                         | 73.2                                                |
| 104.2                                      | 103.9                                        | 104.0                                               |
| 120.44                                     | 120.2                                        | 120.4                                               |
| 142.63                                     | 142.7                                        | 142.4                                               |
| 163.02                                     | 163.3                                        | 163.1                                               |
| 163.64                                     | 163.9                                        | 163.6                                               |
| 185.63                                     | 185.7                                        | 185.4                                               |

\*TMS as internal standard;
